# Supplementary material
Source: PubMed Central journal article supplement (PMC5963546)
Supplement: Supp_Table1.pdf [file Supp_Table1.pdf]

## Supplementary Data

SUPPLEMENTARY TABLE S1. MMPPC TUNING PARAMETERS

| <i>Parameter</i>                  | <i>Lower Bound</i> | <i>Nominal Value</i> | <i>Upper Bound</i> | <i>Description of the Expected Effect</i>                                                                                                                                                               |
|-----------------------------------|--------------------|----------------------|--------------------|---------------------------------------------------------------------------------------------------------------------------------------------------------------------------------------------------------|
| $L_{\text{awake}}$ (mg/dL)        | 40                 | 100                  | 120                | This variable is the lower bound target for daytime bolus calculations. Lowering this makes the controller more aggressive during the day.                                                              |
| $R_{\text{awake}}$ (%)            | 10                 | 25                   | 40                 | This determines how much risk of hypoglycemia is acceptable with a future 50% basal rate buffer. Lowering this will make the controller more cautious during the day.                                   |
| $L_{\text{asleep}}$ (mg/dL)       | 60                 | 100                  | 160                | This variable is the lower bound target for nighttime bolus calculations. Lowering this makes the controller more aggressive during the night.                                                          |
| $S_{\text{asleep}}$               | 6                  | 18                   | 30                 | This determines how smooth we want our control to be at night. Decreasing this will make the controller more aggressive at night.                                                                       |
| $Y_{\text{CGM}}$ (mg/dL)          | 80                 | 80                   | 120                | The threshold below which the hypoglycemia warning light will be at least yellow. Changing this will not affect algorithm performance.                                                                  |
| $R_{\text{CGM,Awake}}^-$ (mg/dL)  | 60                 | 70                   | 100                | The threshold below which the hypoglycemia warning light will be red when the patient is awake. Changing this will not affect algorithm performance.                                                    |
| $R_{\text{CGM,Asleep}}^-$ (mg/dL) | 60                 | 60                   | 100                | The threshold below which the hypoglycemia warning light will be red when the patient is asleep. Changing this will not affect algorithm performance.                                                   |
| $R_{\text{CGM}}^+$ (mg/dL)        | 200                | 300                  | 390                | The threshold required for the insulin based hyperglycemia alarm to sound. Changing this will not affect algorithm performance.                                                                         |
| $R_{\text{IOB}}^+$ (% of TDD)     | 5                  | 20                   | 40                 | The insulin on board as a percentage of the total daily dose that is required for the insulin-based hyperglycemia alarm to sound.                                                                       |
| $R_{\text{CGM}}^{++}$ (mg/dL)     | 200                | 390                  | 390                | The CGM threshold above which the hyperglycemia red light will sound.                                                                                                                                   |
| $S_{\Delta}$                      | 5                  | 30                   | 50                 | This threshold determines the orientation boundary between sleep and wake. Increasing this threshold will make it more likely that the controller acts conservatively, as though the patient is asleep. |
