# Supplementary material
Source: PubMed Central journal article supplement (PMC5963546)
Supplement: Supp_Table2.pdf [file Supp_Table2.pdf]

SUPPLEMENTARY TABLE S2. CHANGES  
TO THE MULTIPLE MODEL PROBABILISTIC  
PREDICTIVE CONTROL TUNING PARAMETERS

|           | <i>Lower bound</i> | <i>Threshold (mg/dL)</i> |
|-----------|--------------------|--------------------------|
| 1950301   | 25%                | 120                      |
| 1950301-2 | —                  | 130                      |
| 1950302   | 25%                | 120                      |
| 1950302-2 | —                  | 130                      |
| 2740101   | 25%                | 120                      |
| 2740102   | 25%                | 120                      |
| 2740102-2 | —                  | 130                      |
| 2740102-3 | —                  | 140                      |
| 2740103   | 25%                | 120                      |
| 2740103-2 | —                  | 110                      |
| 2740104   | 25%                | 120                      |
| 2790201   | 25%                | 120                      |
| 2790201-2 | 20%                | —                        |
| 2790202   | 25%                | 120                      |
| 2790202-2 | 10%                | —                        |
| 2790203   | 25%                | 120                      |
| 2790203-2 | 10%                | —                        |
| 2790204   | 25%                | 120                      |
